# Supplementary material for: Heterogeneous translational dynamics of succinonitrile in the plastic crystalline phase
Source: Royal Society of Chemistry journal article supplement (doi:10.1039/d5cp03114a), 2026-01-01
Supplement: d5cp03114a1.pdf [file d5cp03114a1.pdf]

## Supplementary Information

### Heterogeneous Translational Dynamics of Succinonitrile in the Plastic Crystalline Phase

Keiko Nishikawa,<sup>a\*</sup> and Kozo Fujii<sup>b</sup>

<sup>a</sup>Graduate School of Science, Chiba University, Chiba, Chiba 263-8522, Japan

<sup>b</sup>Center for Analytical Instrumentation, Chiba University, Chiba, Chiba 263-8522, Japan[

\*Corresponding author: k.nishikawa@faculty.chiba-u.jp

**Figure SI-1** The free induction decay (FID) signal of <sup>1</sup>H-NMR for succinonitrile.

(a) Experimental data (blue dots) at 290 K and simulated curve (red curve) obtained under the 1-component assumption. (b) Experimental data (blue dots) at 320 K and simulated curves (green and dark yellow) obtained under 2-component assumption. The sum of these two curves is shown in red. The green and dark yellow curves correspond to the hard and soft components, respectively.

(a)

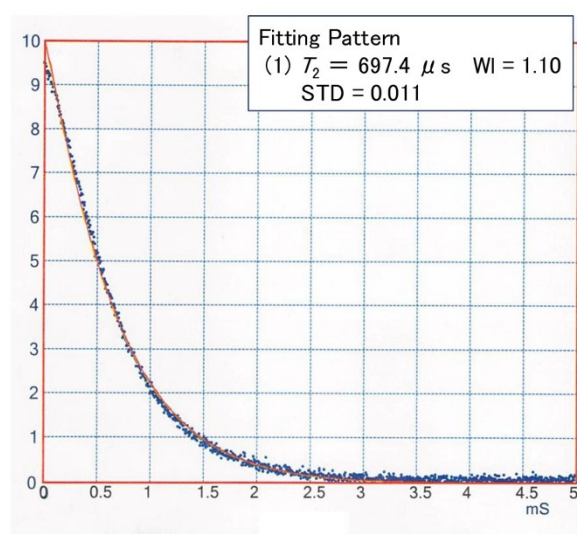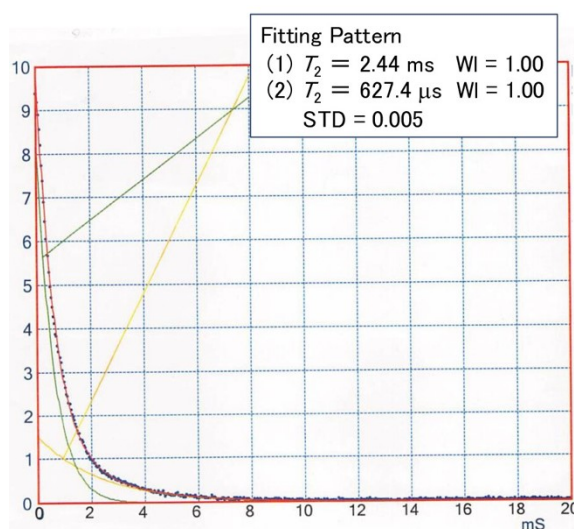

(b)
